# Supplementary material for: Germination characteristics among different sheepgrass (Leymus chinensis) germplasm during the seed development and after-ripening stages
Source: PeerJ. 2019 Apr 10;7:e6688. doi: 10.7717/peerj.6688 (PMC6462180; doi:10.7717/peerj.6688)
Supplement: Supplemental Information 1 — (A) Change in the weight and water content of the developing seeds of sheepgrass. (B) Six types of germination patterns during seed development. (C) The seed germination patterns of eight germplasms at different developmental stages during two consecutive years. (D) After-ripening effect on the seed germination rates of different sheepgrass germplasms after harvest. [file peerj-07-6688-s001.xlsx]

## Sheet: A
	Figure 2 Change in the weight and water content of the developing seeds of sheepgrass
			7 DAP 50 seed each				14 DAP 50 seed each				21 DAP 50 seed each				28 DAP 50 seed each				35 DAP 50 seed each				42 DAP 50 seed each
	编号	REPEAT	FRESH WEIGHT(g)	DRY WEIGHT(g)	WATER CONTENT(%)		FRESH WEIGHT(g)	DRY WEIGHT(g)	WATER CONTENT(%)		FRESH WEIGHT(g)	DRY WEIGHT(g)	WATER CONTENT(%)		FRESH WEIGHT(g)	DRY WEIGHT(g)	WATER CONTENT(%)		FRESH WEIGHT(g)	DRY WEIGHT(g)	WATER CONTENT(%)		FRESH WEIGHT(g)	DRY WEIGHT(g)	WATER CONTENT(%)
	K4	Ⅰ	0.2574	0.11975	53.4771		0.2815	0.1518	46.0746		0.2555	0.141347	44.6782		0.191	0.1454	23.8743		0.1742	0.1494	14.2365		0.149	0.1353	9.19463
		Ⅱ	0.23265	0.10225	56.0499		0.2684	0.1469	45.2683		0.2537	0.143314	43.5106		0.1867	0.1446	22.5495		0.1754	0.1412	19.4983		0.1642	0.1488	9.37881
		Ⅲ	0.27825	0.12855	53.8005		0.2632	0.1316	50		0.2476	0.139792	43.5412		0.2084	0.1573	24.5202		0.1691	0.1547	8.51567		0.1547	0.1397	9.69619
	S19	Ⅰ	0.2036	0.09235	54.6415		0.2196	0.1222	44.3534		0.2111	0.12744	39.6306		0.21	0.1264	39.8095		0.162	0.1391	14.1358		0.1569	0.1392	11.2811
		Ⅱ	0.2283	0.10525	53.8984		0.2395	0.132	44.8852		0.2006	0.120009	40.175		0.2136	0.1304	38.9513		0.1796	0.1558	13.2517		0.1571	0.1394	11.2667
		Ⅲ	0.20455	0.096004	53.0658		0.2155	0.1166	45.8933		0.2252	0.136051	39.5865		0.2068	0.1284	37.911		0.1812	0.1615	10.872		0.148	0.132	10.8108
	N2	Ⅰ	0.27875	0.13075	53.0942		0.299	0.1515	49.3311		0.3128	0.182826	41.5519		0.2707	0.1663	38.5667		0.1616	0.1434	11.2624		0.186	0.1656	10.9677
		Ⅱ	0.26525	0.12625	52.4034		0.2947	0.1511	48.7275						0.2978	0.1775	40.3962		0.1759	0.1524	13.3599		0.19	0.167	12.1053
		Ⅲ	0.3274	0.14825	54.719										0.2703	0.1652	38.8827		0.1729	0.1503	13.0711
		AVERAGE(50 SEED EACHE)	0.252906	0.1166	53.9055		0.260175	0.137963	46.8167		0.243786	0.14154			0.228367	0.149056			0.172433	0.149756			0.163238	0.145875
		AVERAGE(1000 SEED EACHE)	5.05811	2.33201	53.9055		5.2035	2.75925	46.8167		4.87571	2.83079	41.8106		4.56733	2.98111	33.9402		3.44867	2.99511	13.1337		3.26475	2.9175	10.5877
		AVERAGE(1000 SEED EACHE)	FRESH WEIGHT(g)	F Er	DRY WEIGHT(g)	D Er	WATER CONTENT(%)	W Er
		7DAP	4.90256	0.800541	2.33201	0.373818	53.9055	1.09636
		14DAP	5.2035	0.645891	2.75925	0.283656	46.8167	2.19437
		21DAP	4.87571	0.743498	2.83079	0.400272	41.8106	2.10355
		28DAP	4.56733	0.803836	2.98111	0.371231	33.9402	7.76729
		35DAP	3.44867	0.139589	2.99511	0.147218	13.1337	3.0154
		42DAP	3.26475	0.32257	2.9175	0.269693	10.5877	1.04443

## Sheet: B
Figure 3 Six types of germination patterns during seed development of different sheepgrass genotypes.
	Germplasm number	repeat	DAP14/30 seed	DAP21/30 seed	DAP28/30 seed	DAP35/30 seed	DAP42/30 seed
	S13	Ⅰ	6	4	22	22	28
		Ⅱ		2	8	28	26
		Ⅲ	2	2	17	29	28
		Ⅳ	1	2
		average
	S17	Ⅰ	1	7	8	21	19
		Ⅱ		2	4	15	19
		Ⅲ		3	3	15	22
		Ⅳ			6
		average
	S19	Ⅰ	1	18	19	27	29
		Ⅱ	4	6	16	23	30
		Ⅲ	5	9	20	24	29
		Ⅳ	6	4
		average
	N2	Ⅰ	3	3	13	11	28
		Ⅱ	1	3	4	29	20
		Ⅲ	1	1	11	28	26
		Ⅳ	3	3
		average
	N15	Ⅰ			18	17	25
		Ⅱ			20	29	25
		Ⅲ		1	18	28	27
		Ⅳ
		average
	N14	Ⅰ	2	2	6	5	17
		Ⅱ	4	2	2	12	13
		Ⅲ	2	3	4	18	17
		Ⅳ	1	1	1
		average
	C54	Ⅰ		2	3	15	12
		Ⅱ		2	9	14	9
		Ⅲ		3	13	9	14
		Ⅳ		3	9
		average
	Z37	Ⅰ	15	10	19	19	11
		Ⅱ	2	9	12	17	4
		Ⅲ	2	9	7	19	9
		Ⅳ		8	22
		average
	C18	Ⅰ	2	4	8	10	16
		Ⅱ	7	3	6	12	10
		Ⅲ	1		11	16	4
		Ⅳ	3
		average
	S3	Ⅰ		9	4	3	17
		Ⅱ	2	11	15	5	22
		Ⅲ		16	6	8	26
		Ⅳ		17
		average
	C19	Ⅰ	4	5	6	11	8
		Ⅱ	5	2	5	19	5
		Ⅲ	4	2	6	10	7
		Ⅳ	6	3	6
		average
	K4	Ⅰ	13	8	29	27	25
		Ⅱ	7	5	11	29	26
		Ⅲ	10	6	21	28	28
		Ⅳ	10	7
		average
	S2	Ⅰ	8	11		23	4
		Ⅱ	9	13		16	4
		Ⅲ	7	16		16	5
		Ⅳ	8	7
		average
	Q6	Ⅰ	1	6	4	14	11
		Ⅱ		5	3	16	14
		Ⅲ		4	1	13	10
		Ⅳ	1	2
		average
	S3	Ⅰ		9	4	3	17
		Ⅱ	2	11	15	5	22
		Ⅲ		16	6	8	26
		Ⅳ		17
		average
	C1	Ⅰ	2	1	3	6	6
		Ⅱ	7	2	4	5	5
		Ⅲ	3	1	7	7	7
		Ⅳ	1		3
		average
	C5	Ⅰ	2	2	3	2	4
		Ⅱ	3	2	2	7	8
		Ⅲ	5			9	7
		Ⅳ	3	1
		average
	K8	Ⅰ		3	6	6	4
		Ⅱ		3	4	5	6
		Ⅲ		2	3	6	4
		Ⅳ		5	6
		average
	S10	Ⅰ	1	2		2
		Ⅱ	2	5		5	1
		Ⅲ	1	2		3	3
		Ⅳ	1	1	3
		average

## Sheet: C
Figure 4 The seed germination patterns of 8 genotypes at different developmental stages during two consecutive years
		2016 year			2017 year
Germplasm number	Repeat	DAP14/30 seed	DAP28/30 seed	DAP42/30 seed	DAP14/30 seed	DAP28/30 seed	DAP42/30 seed
N4	Ⅰ	7	16	14	9	15	12
	Ⅱ	12	6	10	6	12	14
	Ⅲ	5	21	14	7	14	13
	Ⅳ	8	17
N14	Ⅰ	2	6	17	3	3	22
	Ⅱ	4	2	13	3	4	23
	Ⅲ	2	4	17	5	6	24
	Ⅳ	1	1
S10	Ⅰ	1			1	2	5
	Ⅱ	2		1	3	3	5
	Ⅲ	1		3	3	4	4
	Ⅳ	1	3
C18	Ⅰ	2	8	16	3	6	10
	Ⅱ	7	6	10	3	7	11
	Ⅲ	1	11	4	5	7	12
	Ⅳ	3
K4	Ⅰ	13	29	25	11	20	26
	Ⅱ	7	11	26	9	18	25
	Ⅲ	10	21	28	11	21	29
	Ⅳ	10
N15	Ⅰ		18	25	2	20	22
	Ⅱ		20	25	2	21	21
	Ⅲ		18	27	1	18	23
	Ⅳ
S3	Ⅰ		4	17	2	11	22
	Ⅱ	2	15	22	2	8	23
	Ⅲ		6	26	1	10	23
	Ⅳ
S19	Ⅰ	1	19	29	11	21	26
	Ⅱ	4	16	30	10	20	28
	Ⅲ	5	20	29	8	21	28
	Ⅳ	6

## Sheet: D
Figure 5 After-ripening effect on the seed germination rates of different sheepgrass genotypes after harvest.
	Germplasm number	DAYS AFTER HARVEST	Ⅰ/30 seed	Ⅱ/30 seed	Ⅲ/30 seed
	c5	at harvest time	2	7	9
		15d	13	13	13
		30d	19	21	21
		60d	17	13	16
	N14	at harvest time	17	13	17
		15d	20	20	21
		30d	27	26	27
		60d	23	23	22
	S3	at harvest time	17	22	26
		15d	22	23	22
		30d	27	28	29
		60d	20	18	19
	S17	at harvest time	19	19	22
		15d	17	16	16
		30d	19	20	18
		60d	20	21	20
	C18	at harvest time	16	10	4
		15d	8	7	8
		30d	13	12	11
		60d	14	13	13
	S19	at harvest time	29	30	29
		15d	26	25	26
		30d	30	28	27
		60d	28	29	27
	Z37	at harvest time	11	4	9
		15d	19	18	18
		30d	23	22	26
		60d	25	24	27
	C19	at harvest time	8	5	7
		15d	14	14	15
		30d	16	15	16
		60d	15	16	15
	S10	at harvest time		1	3
		15d	2	2	2
		30d	4	3	2
		60d	4	3	2
	K4	at harvest time	25	26	28
		15d	21	28	27
		30d	26	26	24
		60d	18	21	22

## Sheet: E
Germplasms	Local	GPS coordinates
K8	Qiqihar Fuyu Town Qianjin Village, Heilongjiang Province, China	47°47′E 124°28′N
C1	Machikou Town, Changping District, Beijing, China	40°14′E 116°15′N
C5	Longxing Town, Longjiang County, Qiqihar City, Heilongjiang Province, China	47°20′E 123°12′N
Z37	Shangzhuang Town, Haidian District, Beijing, China	40°06′E 116°11′N
C54	Yunzhou Reservoir, Chicheng County, Zhangjiakou City, Hebei Province, China	40°54′E 115°49′N
S17	Meilis District, Qiqihar City, Heilongjiang Province,China	47°27′E 123°41′N
S10	Woniutun, Dongfeng County, Liaoyuan City, Jilin Province, China	42°39′E 125°31′N
S2	Tongjiang Village, Bayan County, Harbin City, Heilongjiang Province, China	45°57′E 127°28′N
C19	Wengniute Banner, Chifeng, Inner Mongolia,China	47°47′E 124°28′N
S16	Fengshan Town, Fengning County, Chengde City, Hebei Province, China	41°14′E 117°12′N
Q6	Fuhe Town, Zuoqi, Balin, Chifeng City, Inner Mongolia, China	44°27′E 119°17′N
N4	Batun, Jubaoshan, Meilis District, Qiqihar City, Heilongjiang Province, China	47°37′E 123°41′N
N14	Nuanquan Village, Dongxing Street, Yakeshi City, Hulunbuir City, Inner Mongolia Autonomous Region, China	49°15′E 120°42′N
C18	Xuanhua County, Zhangjiakou City, Hebei Province, China	40°33′E 115°01′N
S3	Wencun, Qian'an County, Songyuan City, Jilin Province, China	45°01′E 123°43′N
N2	Guyuan, Zhangjiakou City, Hebei Province, China	41°51′E 115°48′N
N15	Huairou District, Beijing, China	40°54′E 116°37′N
K4	Chaoyangwan Town, Paddock, Chengde City, Hebei Province, China	42°03′E 117°57′N
S13	Yongning Town, Yanqing District, Beijing, China	40°31′E 116°09′N
S19	Sandaogou, Fengning County, Chengde City, Hebei Province, China	41°08′E 116°36′N
